# Supplementary material for: Catalytic Activity of Porous Phosphate Heterostructures-Fe towards Reactive Black 5 Degradation
Source: Hindawi journal article supplement (doi:10.1155/2013/658231), 2013-01-01
Supplement: f1 [file 658231.f1.doc]

Catalytic Activity of Porous Phosphate Heterostructures-Fe (Fe-PPH) Towards
Reactive Black 5 Degradation

Marco S. Lucas a,*, Manuel Algarra b, José Jiménez-Jiménez c, Enrique Rodríguez-Castellón c,José A. Peres a

a *Centro de Química, Universidade de Trás-os-Montes e Alto Douro, Apartado 1013, 5001-801 Vila Real, Portugal.*

b *Centro de Geologia do Porto, Faculdade de Ciências, Universidade do Porto, Rua do Campo Alegre, 687, 4169-007 Porto, Portugal*

c *Departamento de Química Inorgánica, Facultad de Ciencias, Universidad de Málaga, 29071 Málaga, Spain*

**XRD of Synthesized Catalysts**

1. **S5-PPH b) PPH-Fe**

1. **SO3-PPH**
